# Supplementary material for: Droplet Tn-Seq combines microfluidics with Tn-Seq for identifying complex single-cell phenotypes
Source: PubMed Central journal article supplement (PMC6914776; doi:10.1038/s41467-019-13719-9), 2019-12-16
Supplement: 41467_2019_13719_MOESM9_ESM.pdf [file 41467_2019_13719_MOESM9_ESM.pdf]

**Title:** Supplementary Data 1

**Description:** CAD Microfluidic device. Description: CAD layout of the microfluidic device used in this study. 3.

**Title:** Supplementary Data 2

**Description:** (d)Tn-Seq Fitness of *S. pneumoniae* 19F in 1% Agarose. Description: (droplet) Tn-Seq data of *S. pneumoniae* Taiwan-19F grown in 1% agarose droplets. 4.

**Title:** Supplementary Data 3

**Description:** (d)Tn-Seq Fitness of *S. pneumoniae* TIGR4 in AGP. Description: (droplet) Tn-Seq data of *S. pneumoniae* TIGR4 grown in droplets and liquid media with AGP as the main carbon source. 5.

**Title:** Supplementary Data 4.

**Description:** (d)Tn-Seq Fitness of *S. pneumoniae* TIGR4 in Elastase. Description: (droplet) Tn-Seq data of *S. pneumoniae* TIGR4 exposed in droplets and liquid media to the protease Elastase. 6.

**Title:** Supplementary Data 5.

**Description:** Adapters and primers. Description: All adapters and primers used in this study. 7.

**Title:** Supplementary Data 6.

**Description:** Strains and Plasmids. Description: All bacterial strains and plasmids used in this study.
